# Supplementary material
Source: PubMed Central journal article supplement (PMC138802)
Supplement: 1471-2164-3-33-S2.pdf [file 1471-2164-3-33-S2.pdf]

Predicted Sec. Str.
MM1377\_Mma\_21227479
MA0084\_Mac\_2008983
Gmet0782\_Gme\_23053876
all10567\_Ana\_17228063
s1r1444\_Ssp\_16330148
CT0884\_Chte\_21673712
SCF11\_24\_Scoe\_21219079
Rv2226\_Mtu\_15609363
Cg12231\_Cgl\_21325002
Cg12182\_Cgl\_19553432
PA2872\_Pae\_15598068
m114591\_Mlo\_13473856
Sme03155\_Sme\_15966639
Atu4492\_Atu\_17938181
Rsc3043\_Rsol\_17547762
DR2614\_Dr\_15807595
SSO1190\_Sso\_15898044
CC3522\_Cor\_16127752
m119114\_Mlo\_13488075
VC2440\_Vch\_15642436
YPO0652\_Ype\_16120977
CTY3381\_Sen\_16761976
ygiF\_StLT2\_16766502
ygiF\_Ec\_16130950
consensus/90%

Predicted Sec. Str.
MM1377\_Mma\_21227479
MA0084\_Mac\_2008983
Gmet0782\_Gme\_23053876
all10567\_Ana\_17228063
s1r1444\_Ssp\_16330148
CT0884\_Chte\_21673712
SCF11\_24\_Scoe\_21219079
Rv2226\_Mtu\_15609363
Cg12231\_Cgl\_21325002
Cg12182\_Cgl\_19553432
PA2872\_Pae\_15598068
m114591\_Mlo\_13473856
Sme03155\_Sme\_15966639
Atu4492\_Atu\_17938181
Rsc3043\_Rsol\_17547762
DR2614\_Dr\_15807595
SSO1190\_Sso\_15898044
CC3522\_Cor\_16127752
m119114\_Mlo\_13488075
VC2440\_Vch\_15642436
YPO0652\_Ype\_16120977
CTY3381\_Sen\_16761976
ygiF\_StLT2\_16766502
ygiF\_Ec\_16130950
consensus/90%
